# Supplementary material
Source: PubMed Central journal article supplement (PMC4469264)

Supplemental Figure 1 (available online only): TCGA data showing that for patients with HPV+ tumor, mRNA expression of MMP-2 and MMP-14 positively correlate.

## Supplemental Figure 1

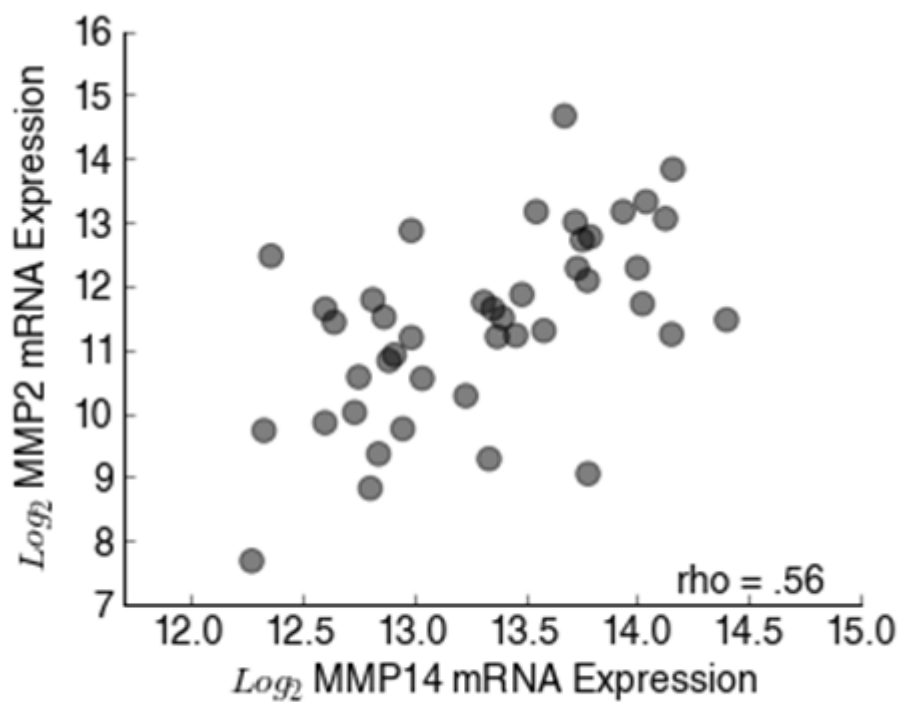

Supplemental Figure 2 (available online only): Mouse HNSCC tongue xenografts demonstrate greater MMP2/9 activity compared to normal tongue tissue. Bar graphs display MMP activity of samples as a percentage of activity of pure MMP standard.

## Supplemental Figure 2

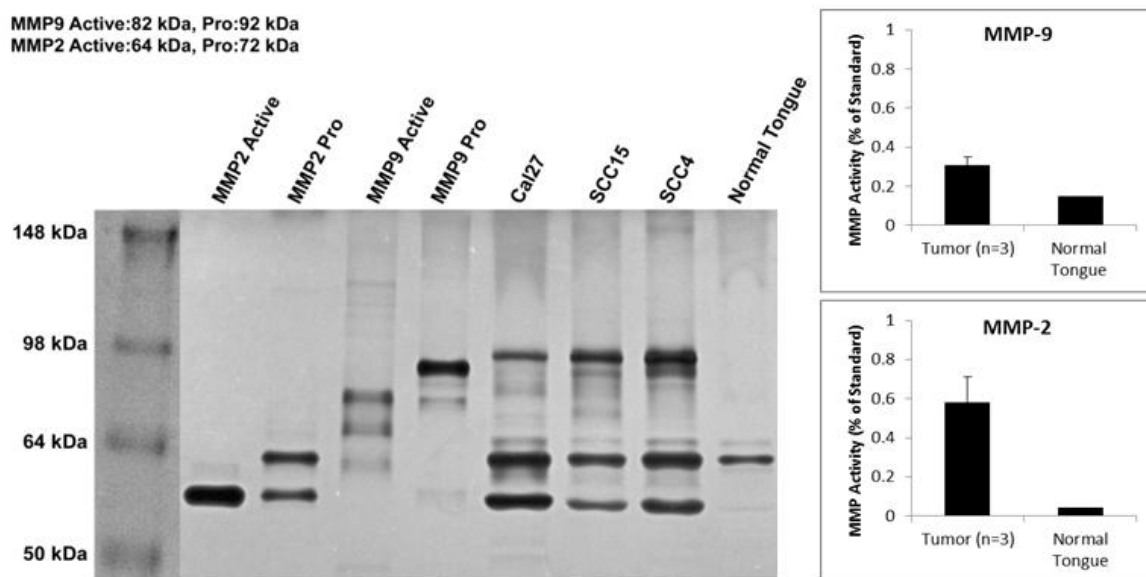

Supplement: NIHMS699472-supplement-supplemental.pdf [file NIHMS699472-supplement-supplemental.pdf]
